# Supplementary material for: Eco-Friendly Synthesis and Characterization of Crystalline Selenium Nanoparticles via Bacillus cereus
Source: Research Square preprint supplement (doi:10.21203/rs.3.rs-7492605/v1), 2025-09-03
Supplement: Supplementary file 1 [file 1bdc2068b3ced15404a60545.docx]

**Supplementary Information**

**of**

**Eco-Friendly Synthesis and Characterization of Crystalline Selenium Nanoparticles from *Bacillus cereus***

Saibal Ghosh1Δ, Shouvik Mahanty2Δ, Sristi Das3, Shreeya Purkait3,4, Gopala Krishna Darbha2, Raktim Pal1*, Santanu Majumder5*

1Department of Analytical Services, Tocklai Tea Research Institute, Tea Research Association, Jorhat 785008, Assam, India

2Environmental Nanoscience Laboratory, Department of Earth Sciences, Indian Institute of Science Education and Research Kolkata, Mohanpur 741246, Nadia, West Bengal, India

3Agricultural and Ecological Research Unit, Indian Statistical Institute, Giridih, 815301, Jharkhand, India

4School of Materials Science and Nanotechnology, Jadavpur University, Kolkata-700032, India

5School of Life and Environmental Sciences, Bournemouth University (Talbot Campus), Fern Barrow, Poole BH12 5BB, UK

ΔEqual contributors

***Corresponding author:** Dr Santanu Majumder, School of Life and Environmental Sciences, Bournemouth University (Talbot Campus), Fern Barrow, Poole BH12 5BB, UK.

Email: [smajumder@bournemouth.ac.uk](mailto:smajumder@bournemouth.ac.uk)

Dr. Raktim Pal, Department of Analytical Services, Tocklai Tea Research Institute, Tea Research Association, Jorhat 785008, Assam, India.

Email: [r.pal@tocklai.net](mailto:r.pal@tocklai.net)


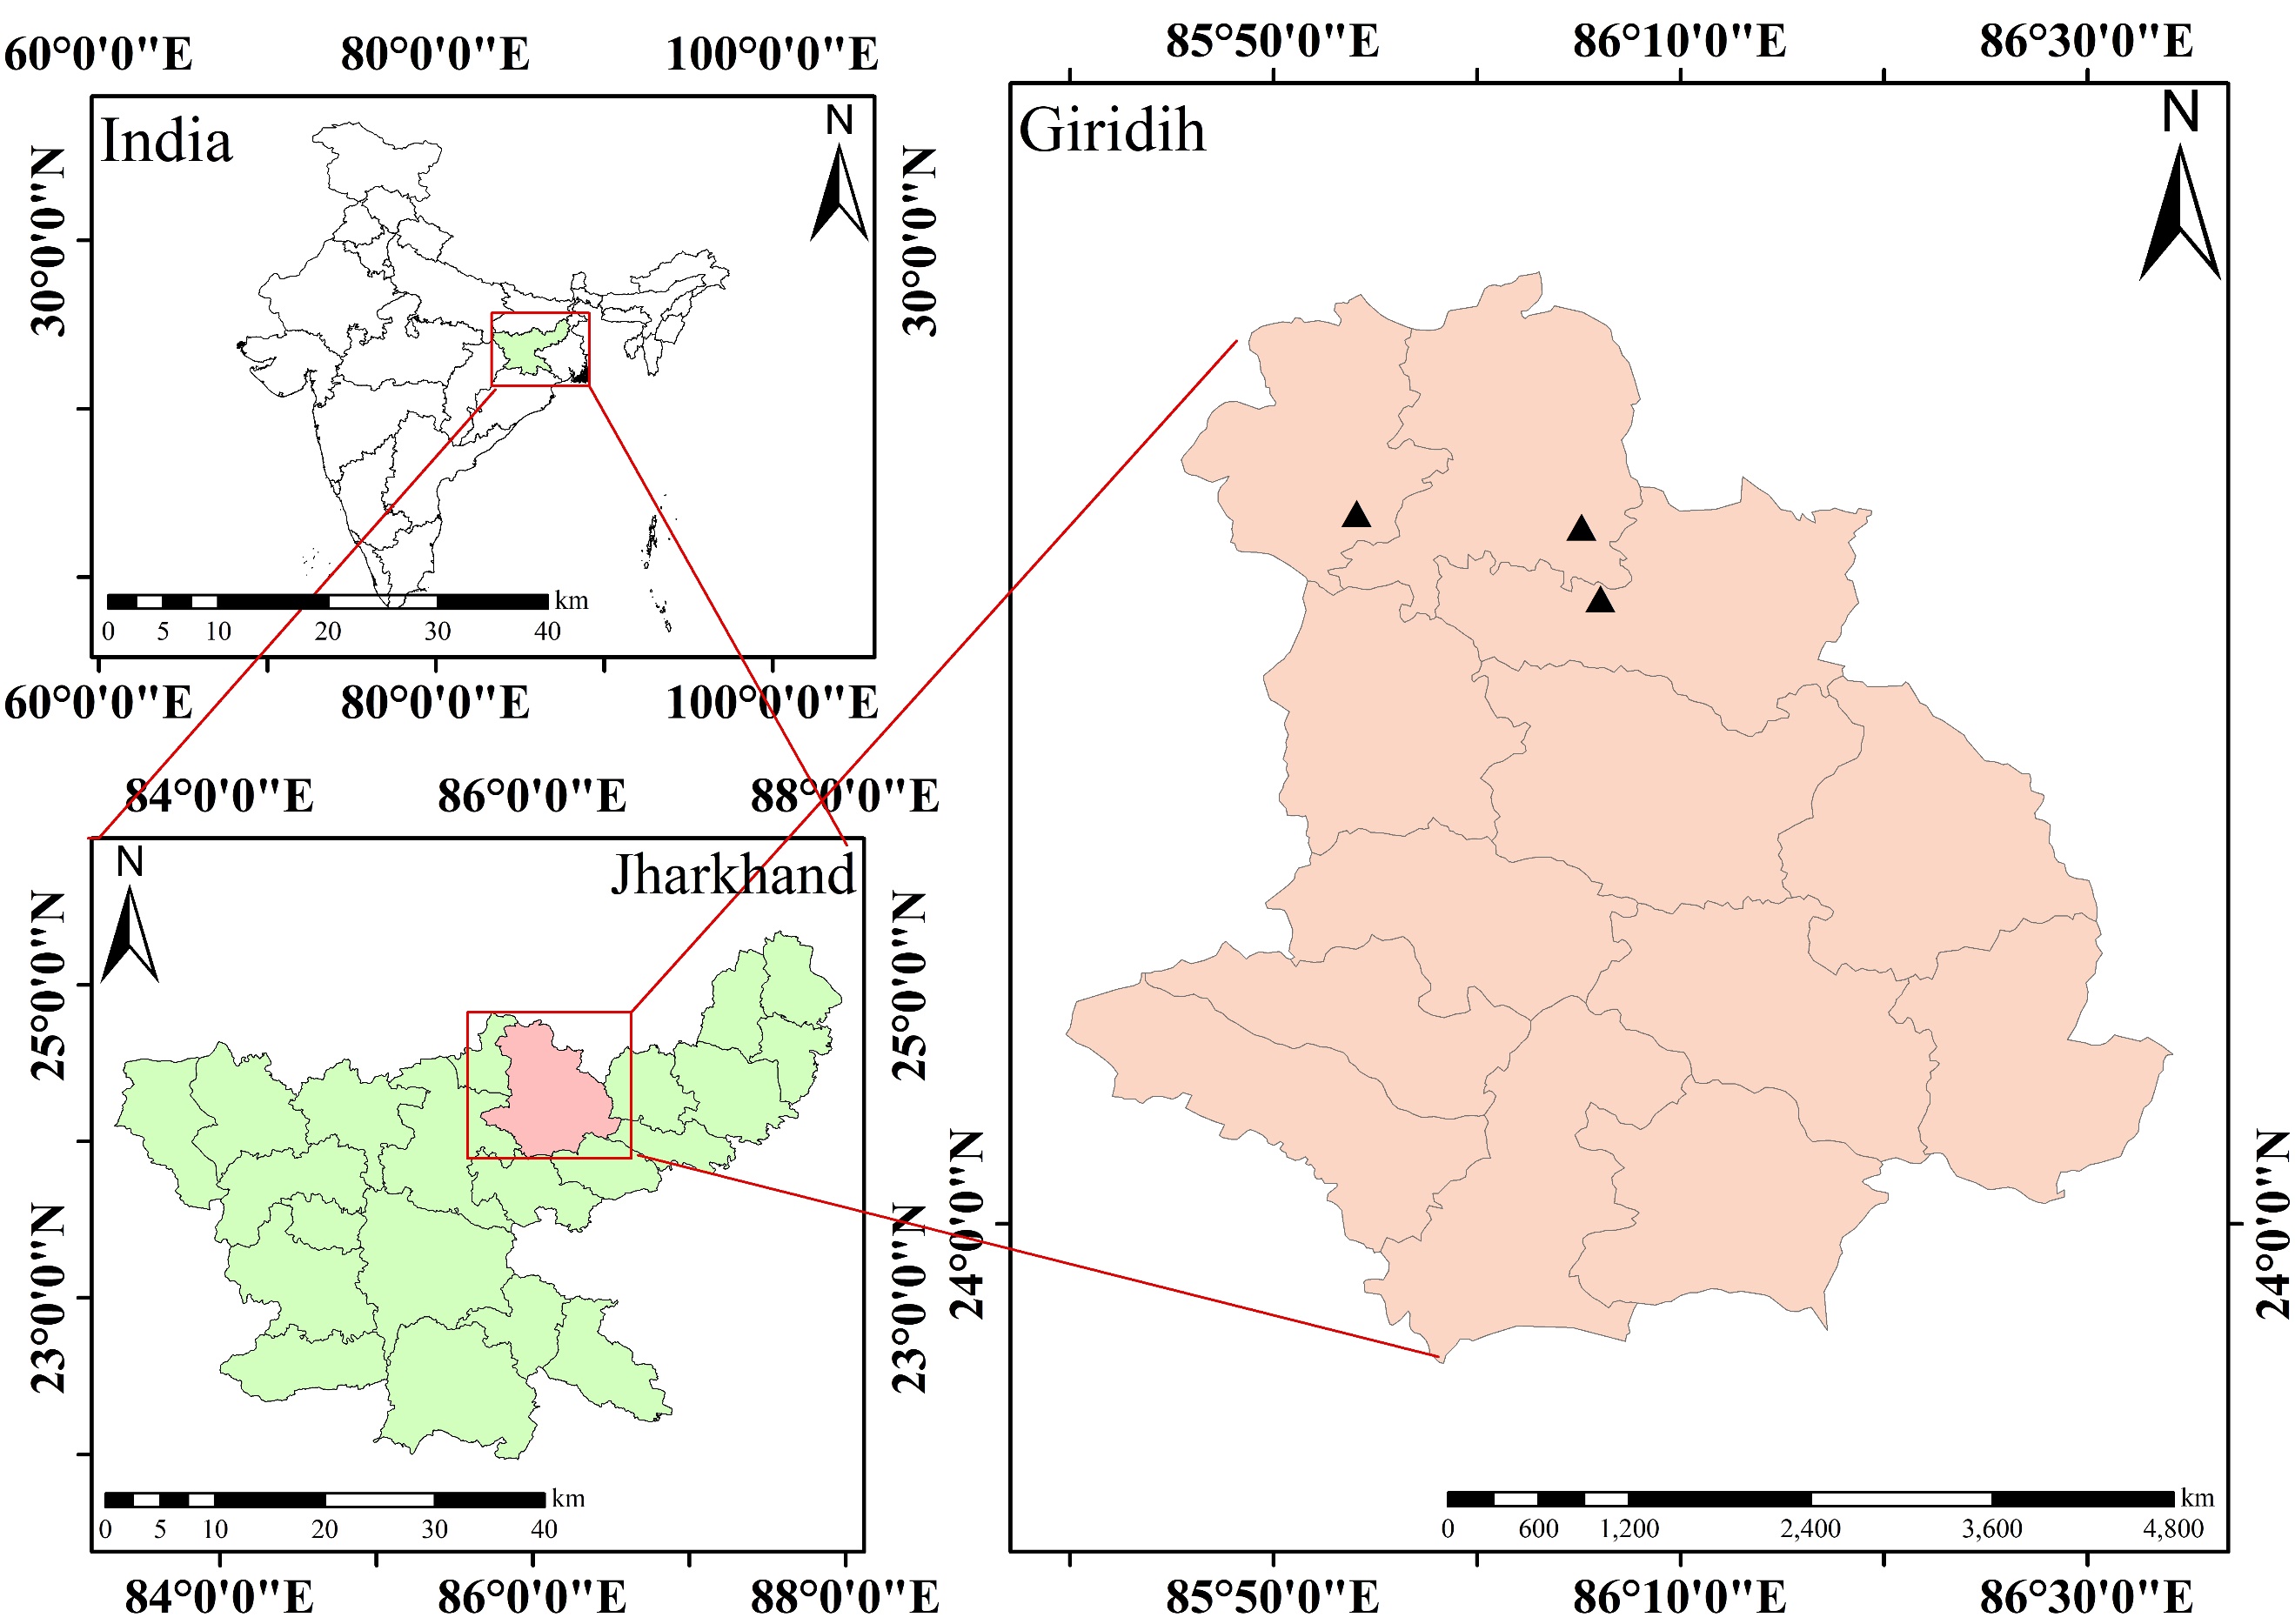


**Fig. S1:** Sampling locations of mica mines distributed across three blocks (Deori, Gawan, and Tisri) of Giridih district of Jharkhand, India.


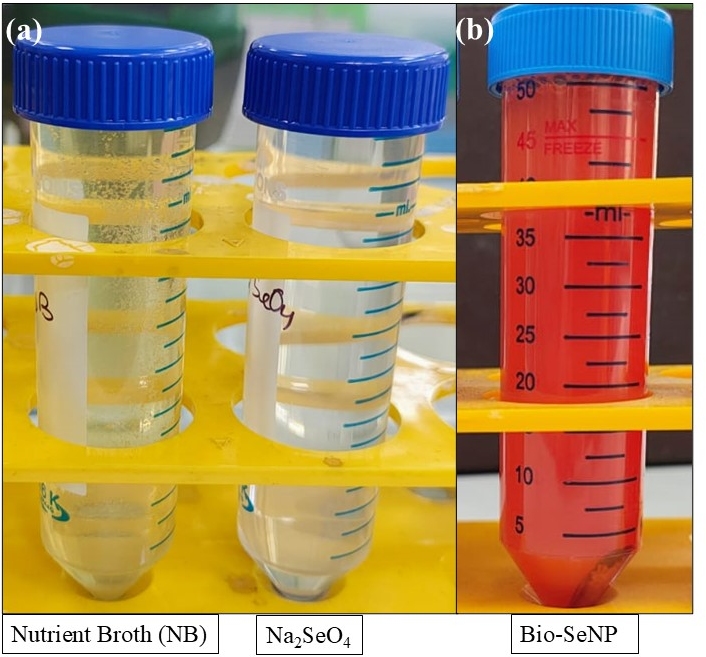


**Fig. S2:** Bacterial isolates of the strain *Bacillus cereus* showing color changes during the reaction with selenium salt solution over 48 hours of incubation: (a) positive and negative controls — nutrient broth without selenium salt and selenium salt without nutrient broth, respectively; and (b) appearance of red color due to the addition of nutrient broth with selenium salt and bacterial isolates.


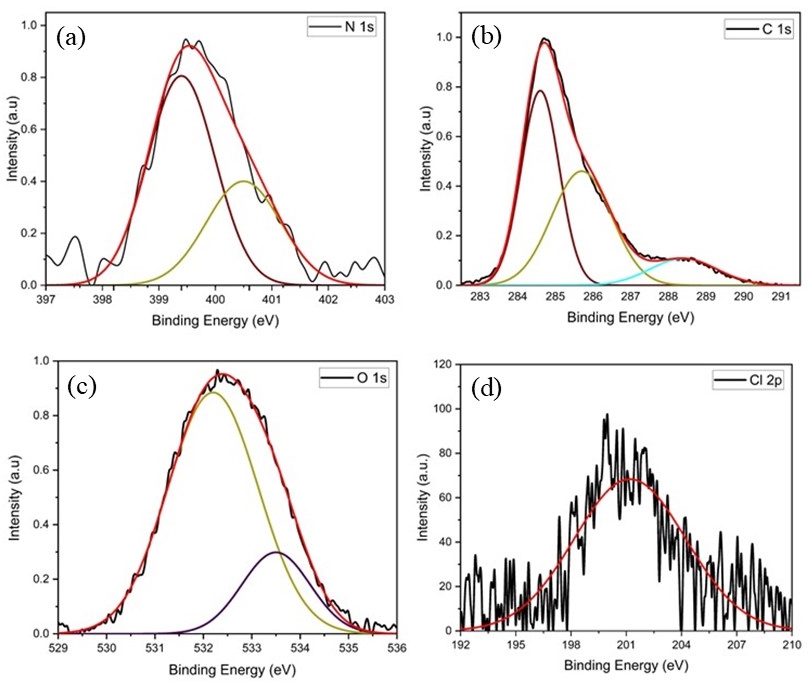


**Fig S3**. XPS high-resolution spectra of nitrogen (a: N 1s), carbon (b: C 1s), oxygen (c:O 1s), and (d: Cl 2p) from the purified SeNPs.

**Table S1:** Binding energies (eV) and assignment of XPS spectral bands of as-synthesized SeNPs

| **Element name** | **Binding Energy (eV)** | **Assignment** |
| --- | --- | --- |
| C 1s | 284.8 | C-C or C-H |
| 285.7 | C-O or C-H |
| 288.6 | C=O or O-C-C |
| O 1s | 532.2 | C=O |
| 533.3 | C-O |
| N | 399.3 | Amine group |
| 400.5 | Protonated amine group |
| Cl 2p | 199.9 | 2p1/2 |
| Se 3d | 55.3 | 3d3/2 |
| 56.5 | 3d5/2 |
